# Supplementary material for: The Impact of Digitization on Print Book Sales: Analysis Using Genre Exposure Heterogeneity
Source: Atypon-hosted journal article supplement (doi:10.1287/msom.2022.0594), 2025-01-27
Supplement: msom.2022.0594.sm1.pdf [file msom.2022.0594.sm1.pdf]

# The Impact of Digitization on Print Book Sales: Analysis using Genre Exposure Heterogeneity

Siddhartha Sharma\*, Rahul Telang<sup>†</sup> and Alejandro Zentner<sup>‡</sup>

## A Online Appendix

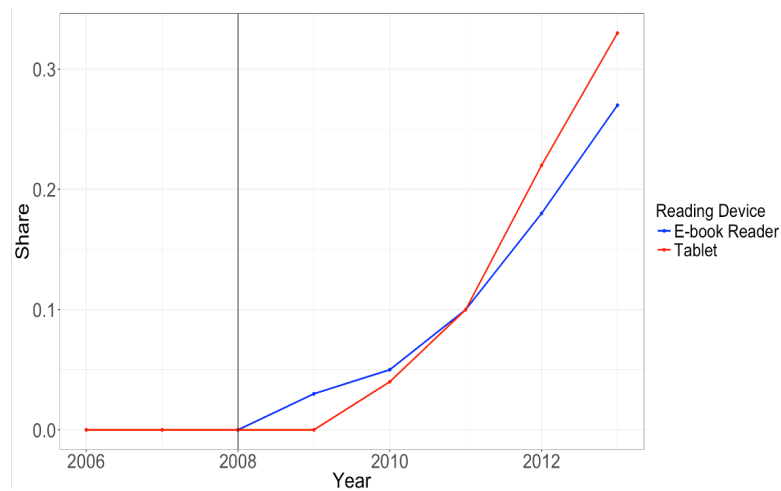

Figure A.1: *Share of US Adults Owning an E-reading Device*

(Source: <https://www.pewresearch.org/internet/2015/10/29/technology-device-ownership-2015/>)

[//www.pewresearch.org/internet/2015/10/29/technology-device-ownership-2015/](https://www.pewresearch.org/internet/2015/10/29/technology-device-ownership-2015/))

---

\*Kelley School of Business, Indiana University, Bloomington, Indiana 47405, sishar@iu.edu

<sup>†</sup>Heinz College, Carnegie Mellon University, Pittsburgh, Pennsylvania 15213 rtelang@andrew.cmu.edu

<sup>‡</sup>Naveen Jindal School of Management, University of Texas at Dallas, Richardson, Texas 75080, azentner@utdallas.edu

Table A.1: Summary of Literature on Physical-Digital Channel Interaction

| Industry  | Paper                                                                              | Data                                                                                                                                                          | Main Finding                                                                                                                                                                                                                                                                                                     |
|-----------|------------------------------------------------------------------------------------|---------------------------------------------------------------------------------------------------------------------------------------------------------------|------------------------------------------------------------------------------------------------------------------------------------------------------------------------------------------------------------------------------------------------------------------------------------------------------------------|
| Music     | Zentner (2006)<br>Oberholzer-Gee and Strumpf (2007)                                | Forrester Research, Europe, 2001, 22.5K users<br>Nielsen SoundScan, US, 2002, 3K albums                                                                       | Illegal file sharing decreases legal sales<br>Illegal file sharing does not affect legal sales                                                                                                                                                                                                                   |
| Newspaper | Gentzkow (2007)                                                                    | Scarborough Research, DC, 2000-03, 16K users                                                                                                                  | Online channel reduced print readership                                                                                                                                                                                                                                                                          |
| Movie     | Danaher et al (2010)<br>Ma et al (2014)<br>Peukert et al (2017)<br>Lu et al (2020) | NBC content on iTunes, 2007-08<br>BoxOfficeMojo, VCDQuality, 2006-08, 533 movies<br>Country-level box office, 2011-2012, 308 movies<br>All US movies, 2015-17 | Legal digital channel mitigates the impact of piracy on the physical channel<br>Pre-release piracy reduces box office sales<br>Megapload shutdown had a positive effect on wide-release movies and a negative effect on niche movies<br>Post-release piracy is associated with an increase in box office revenue |
| Retail    | Wang and Goldfarb (2017)<br>Bell et al (2018)<br>Kumar et al (2019)                | US specialty retailer, 2010-12, 42K users<br>US eyewear retailer, 2010-13, 1927 ZIP codes<br>US clothing retailer, 2001-04, 213K customers                    | Opening a physical store leads to lower online sales in places with a strong presence, and vice versa<br>Opening a physical store leads to higher online sales<br>Opening a physical store leads to higher online sales                                                                                          |
| Book      | Chen et al (2019)<br>Li (2021)<br>Nagaraj and Reimers (2023)                       | US publisher, 2010, 182 titles<br>Comscore and Esri, USA, 2008-12, 73K online transactions<br>Pre-1923 Harvard library, NPD BookScan, 2003-11, 9K books       | Delaying ebook release did not impact hardcover sales, although the standard errors are large<br>Most ebook sales come from cannibalizing print sales<br>Digitization had a positive impact on physical book sales                                                                                               |

Table A.2: Effects with Different Sales Thresholds

|          | <i>DV: ln(Sales)</i> |          |          |         |
|----------|----------------------|----------|----------|---------|
|          | > 100                | > 50     | > 10     | > 2     |
| AF       | 0.424*               | 0.481**  | 0.455*   | 0.329   |
|          | (0.166)              | (0.180)  | (0.195)  | (0.191) |
| AF*Post  | -0.360**             | -0.412** | -0.392** | -0.306* |
|          | (0.122)              | (0.131)  | (0.137)  | (0.119) |
| <i>N</i> | 117582               | 142368   | 231231   | 329747  |

*Significance levels:* \*  $p < 0.05$ , \*\*  $p < 0.01$ , \*\*\*  $p < 0.001$ .

*Note:* Cluster-robust standard errors (at the subgenre level) are shown in parentheses. All specifications include year and publisher fixed effects.

Table A.3: Heterogeneous Effects Over Time for Adult Fiction

|            | <i>ln(Sales)</i> |
|------------|------------------|
| AF         | 0.428*           |
|            | (0.166)          |
| AF*2008-11 | -0.183           |
|            | (0.117)          |
| AF*2012-15 | -0.529***        |
|            | (0.138)          |
| <i>N</i>   | 117582           |

\*  $p < 0.05$ , \*\*  $p < 0.01$ , \*\*\*  $p < 0.001$ .

*Note:* Cluster-robust standard errors (at the subgenre level) are shown in parentheses. The specification includes year and publisher fixed effects.

Table A.4: Count and Average Unit Print Sales Summary for Major and Non-major Publishers

|           |                      | #Books  |         | Sales per Book     |                    |
|-----------|----------------------|---------|---------|--------------------|--------------------|
|           |                      | 2004-07 | 2008-15 | 2004-07            | 2008-15            |
| Major     | Adult Fiction        | 17,524  | 39,385  | 13,031<br>(50,566) | 10,546<br>(56,004) |
|           | Juvenile Non-fiction | 4,240   | 8,097   | 7,227<br>(21,791)  | 8,681<br>(30,278)  |
| Non-major | Adult Fiction        | 10,609  | 23,375  | 1,831<br>(4,783)   | 825<br>(3507)      |
|           | Juvenile Non-fiction | 4,897   | 10,000  | 1,559<br>(3,387)   | 1,477<br>(4,736)   |

Standard deviations in parentheses

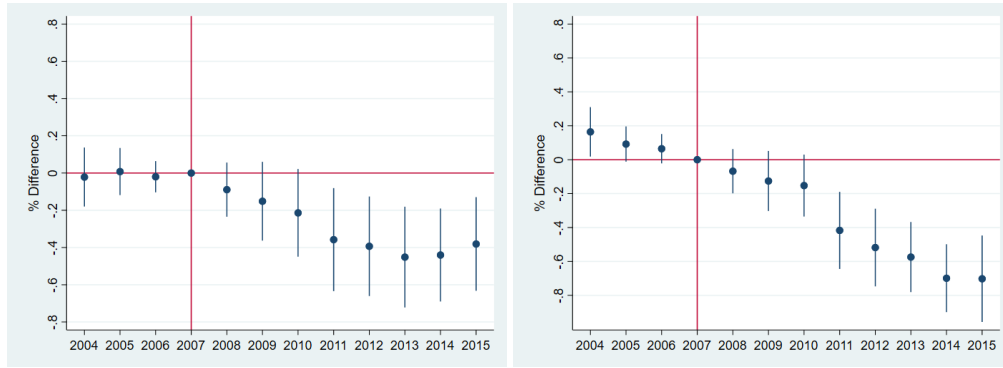

(a) Juvenile Fiction as Control Group

(b) Religion as Control Group

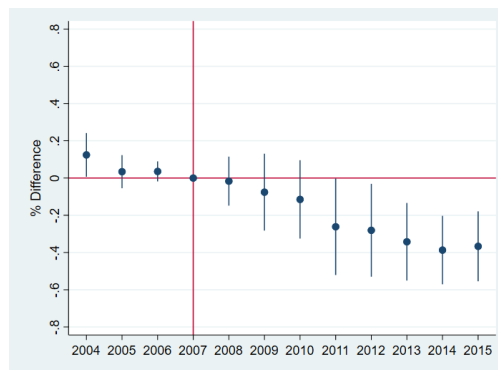

(c) Adult Non-fiction as Control Group

Figure A.2: *Effect for Adult Fiction over Years with Different Genres as Control Group*

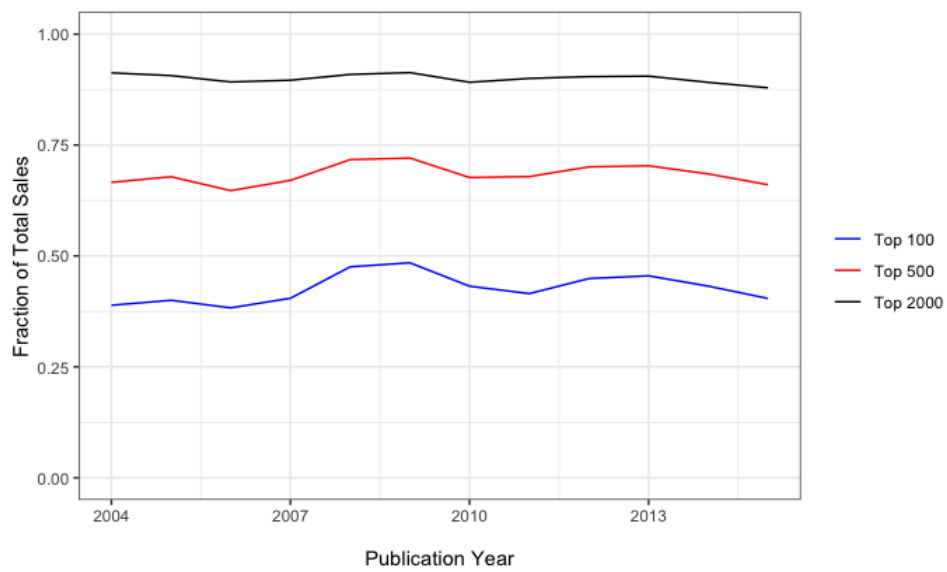

Figure A.3: *Fraction of Total Print Sales of Top N Titles in Adult Fiction over Years*

Table A.5: Balance Before and After Matching Subgenres

| Variable              | Matched | Treated | Control |
|-----------------------|---------|---------|---------|
| Avg. Price            | No      | 17.9    | 35.7    |
|                       | Yes     | 17.9    | 17.8    |
| Avg. Pre-period Sales | No      | 4514    | 2647    |
|                       | Yes     | 4514    | 3119    |

Table A.6: Effect Estimates for Same Number of Non-top Books

|          | Non-top 100         | Non-top 500         | Non-top 1000         | Non-top 2000         |
|----------|---------------------|---------------------|----------------------|----------------------|
| AF       | 0.526***<br>(0.147) | 0.746***<br>(0.121) | 0.996***<br>(0.111)  | 1.450***<br>(0.085)  |
| AF*Post  | -0.332**<br>(0.112) | -0.291**<br>(0.094) | -0.282***<br>(0.080) | -0.496***<br>(0.055) |
| <i>N</i> | 115183              | 105587              | 93593                | 69689                |

*Significance levels:* \*  $p < 0.05$ , \*\*  $p < 0.01$ , \*\*\*  $p < 0.001$ .

*Note:* Cluster-robust standard errors (at the subgenre level) are shown in parentheses. All specifications include year and publisher fixed effects.

Table A.7: Effect Estimates for Adult Fiction using Different Approaches

| Specification                             | Estimate (%) |
|-------------------------------------------|--------------|
| JNF as control group                      | 30           |
| Genre ebook share as treatment            | 26           |
| PSM at subgenre level                     | 27           |
| ANF as control group                      | 24           |
| JF as control group                       | 26           |
| REL as control group                      | 38           |
| Controlling for price and other variables | 29           |
| With publisher-year FE                    | 36           |

Table A.8: Heterogeneous Effects for Adult Fiction using the First Specification

| Sub-sample         | Estimate (%) |
|--------------------|--------------|
| Major publishers   | 26           |
| High-selling books | 18           |
| Paperback          | 38           |
| 2012-15            | 41           |
